# Supplementary material for: Computation-driven redesign of an NRPS-like carboxylic acid reductase improves activity and selectivity
Source: PubMed Central journal article supplement — Sci Adv. 2024 Nov 29;10(48):eadp6775. doi: 10.1126/sciadv.adp6775 (PMC11606446; doi:10.1126/sciadv.adp6775), 2024-11-29
Supplement: sciadv.adp6775_sm.pdf [file sciadv.adp6775_sm.pdf]

Supplementary Materials for  
**Computation-driven redesign of an NRPS-like carboxylic acid reductase  
improves activity and selectivity**

Kun Shi *et al.*

Corresponding author: Hui-Lei Yu, huileiyu@ecust.edu.cn

*Sci. Adv.* **10**, eadp6775 (2024)  
DOI: 10.1126/sciadv.adp6775

**This PDF file includes:**

Figs. S1 to S13  
Tables S1 to S7

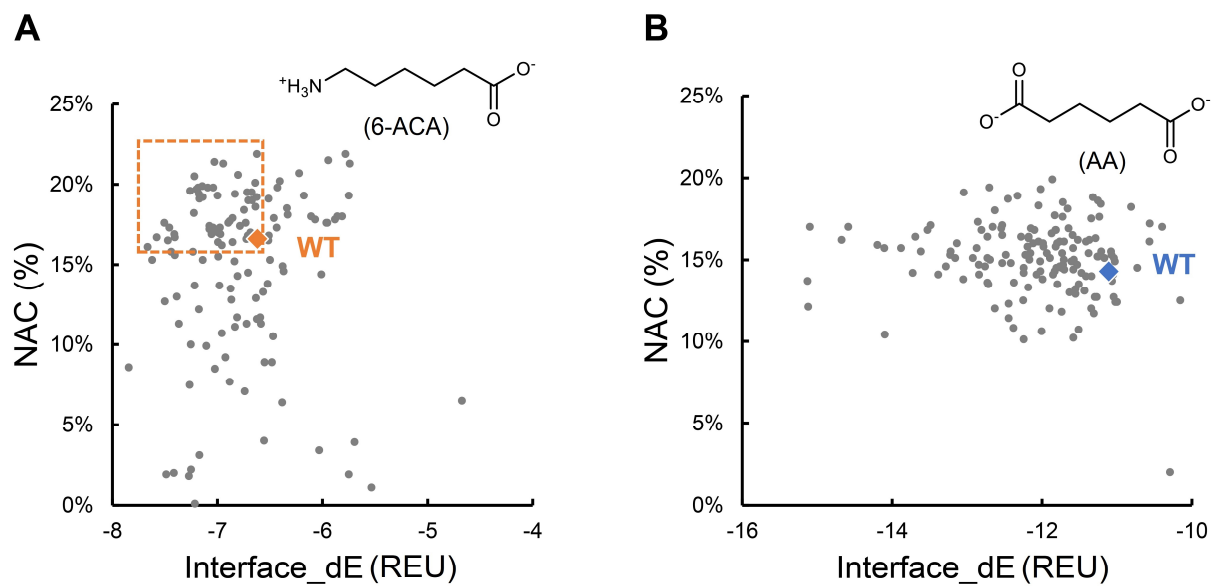

**Fig. S1. *In silico* site saturation mutagenesis.** (A) 6-ACA as substrate. Points in orange square: 38 mutants selected for experiment validation. (B) AA as substrate.

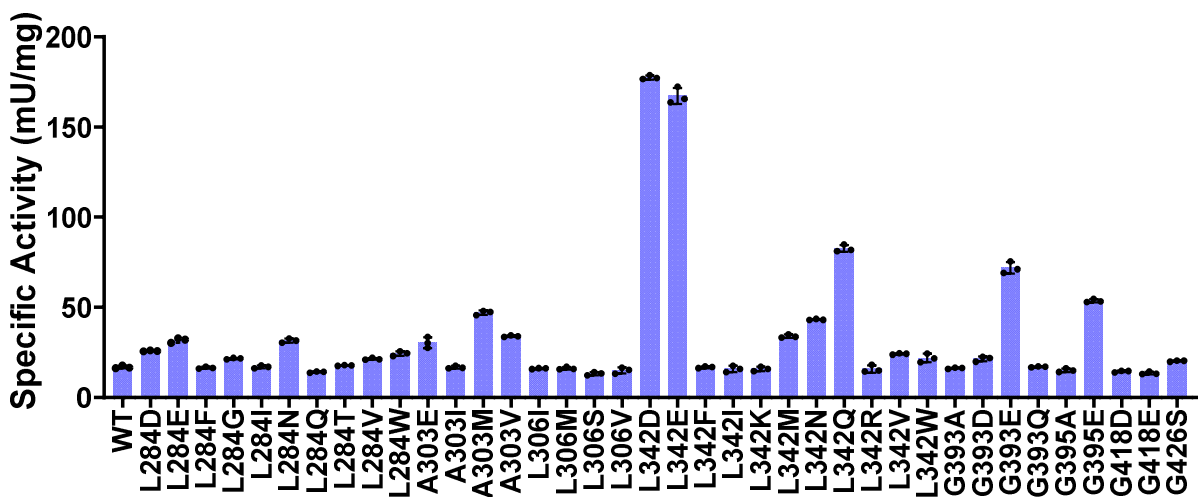

**Fig. S2. Validation of *in silico* site mutations (selected from Fig. S1A) for reductase activity toward 6-ACA.** Data are presented as mean values +/- SD (n=3 independent experiments). Assays were conducted with 10 mM substrates.

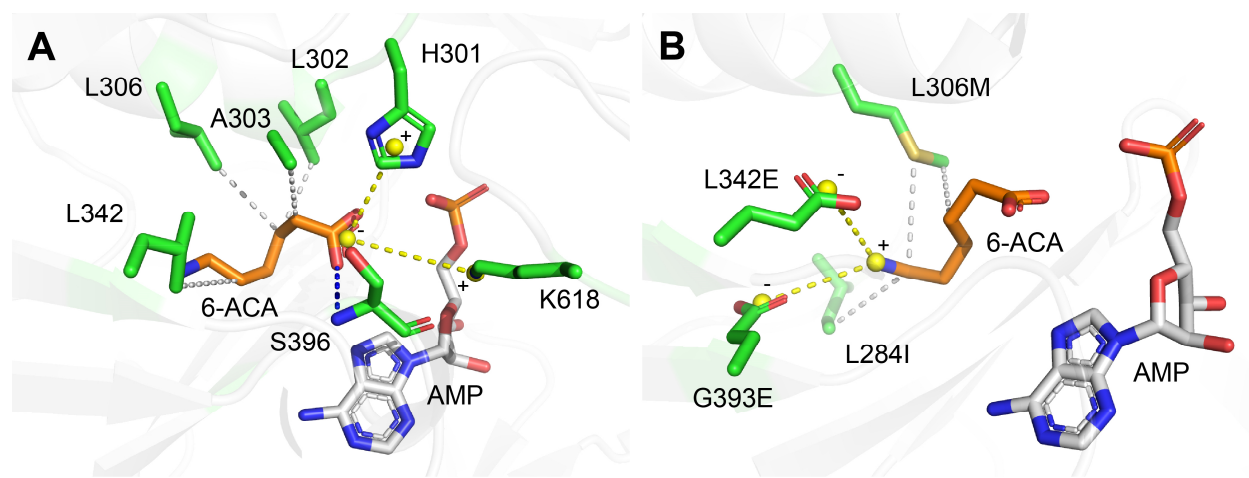

**Fig. S3. Structural comparison of the Rosetta-predicted mode between the *MabCAR3\_WT* and ACA-4 with the bound substrate 6-ACA. (A) the active site of WT. (B) the active site of ACA-4, highlighting the predicted formation of new hydrophobic interactions and salt bridges. Yellow lines: salt bridge. Blue lines: hydrogen bond. Grey lines: hydrophobic interaction.**

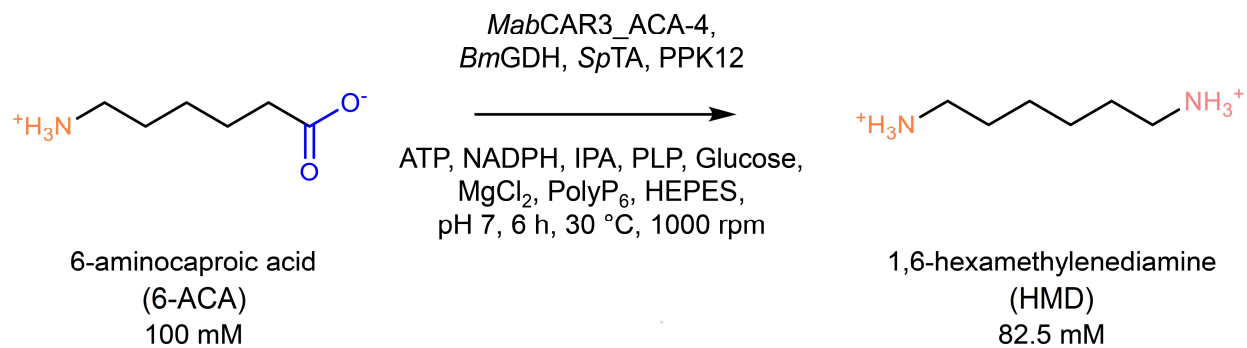

**Fig. S4. The biosynthesis of HMD from 6-ACA using purified ACA-4 and other necessary enzymes.**

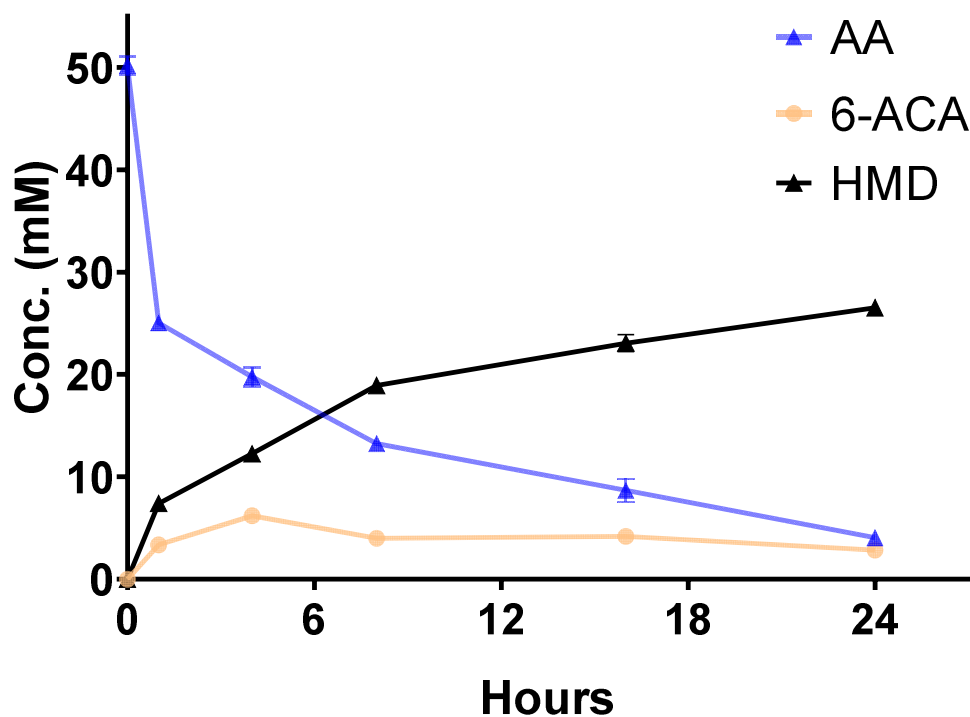

**Fig. S5. Time course for condensed crude enzymes-catalyzed conversion of AA to HMD with 50 mM substrate in a 10-mL reaction mixture (using ACA-1 and ACA-4).** Data are presented as mean values  $\pm$  SD ( $n=3$  independent experiments). The reaction mixtures contained 500 mM HEPES-Na buffer (pH 7.5), 50 mM substrate AA, 1 mM NADP<sup>+</sup>, 10 mM ATP, 120 mM MgCl<sub>2</sub>, 120 mM Glucose, 1 mM PLP, 200 mM IPA, 100 mM PolyP<sub>6</sub>; 8 mg/mL lyophilized enzyme powder of *BmGDH*, 20 mg/mL lyophilized enzyme powder of PPK12, 50 mg/mL crude cell extract of *MabCAR3\_ACA-1*, 100 mg/mL crude cell extract of *MabCAR3\_ACA-4*, 240 mg/mL crude cell extract of *SpTA*, 30 °C, 800 rpm.

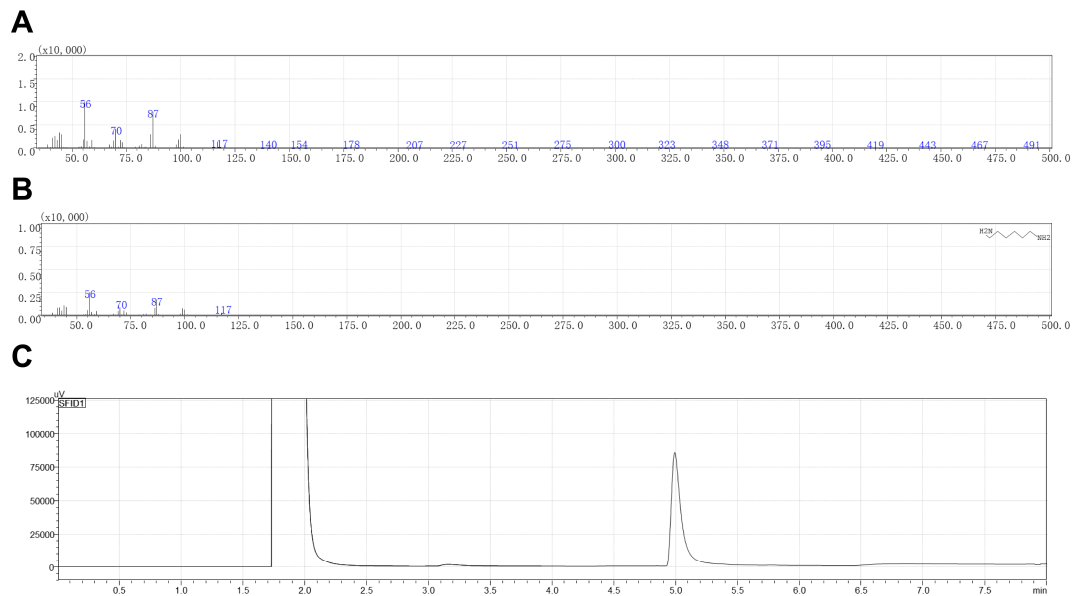

**Fig. S6. The GC-MS/GC analysis of the preparation of HMD. (A) Mass spectrometry analysis of HMD product. (B) Mass spectrometry analysis of HMD standard in NIST database. (C) The GC results for the preparation of HMD (5 min).**

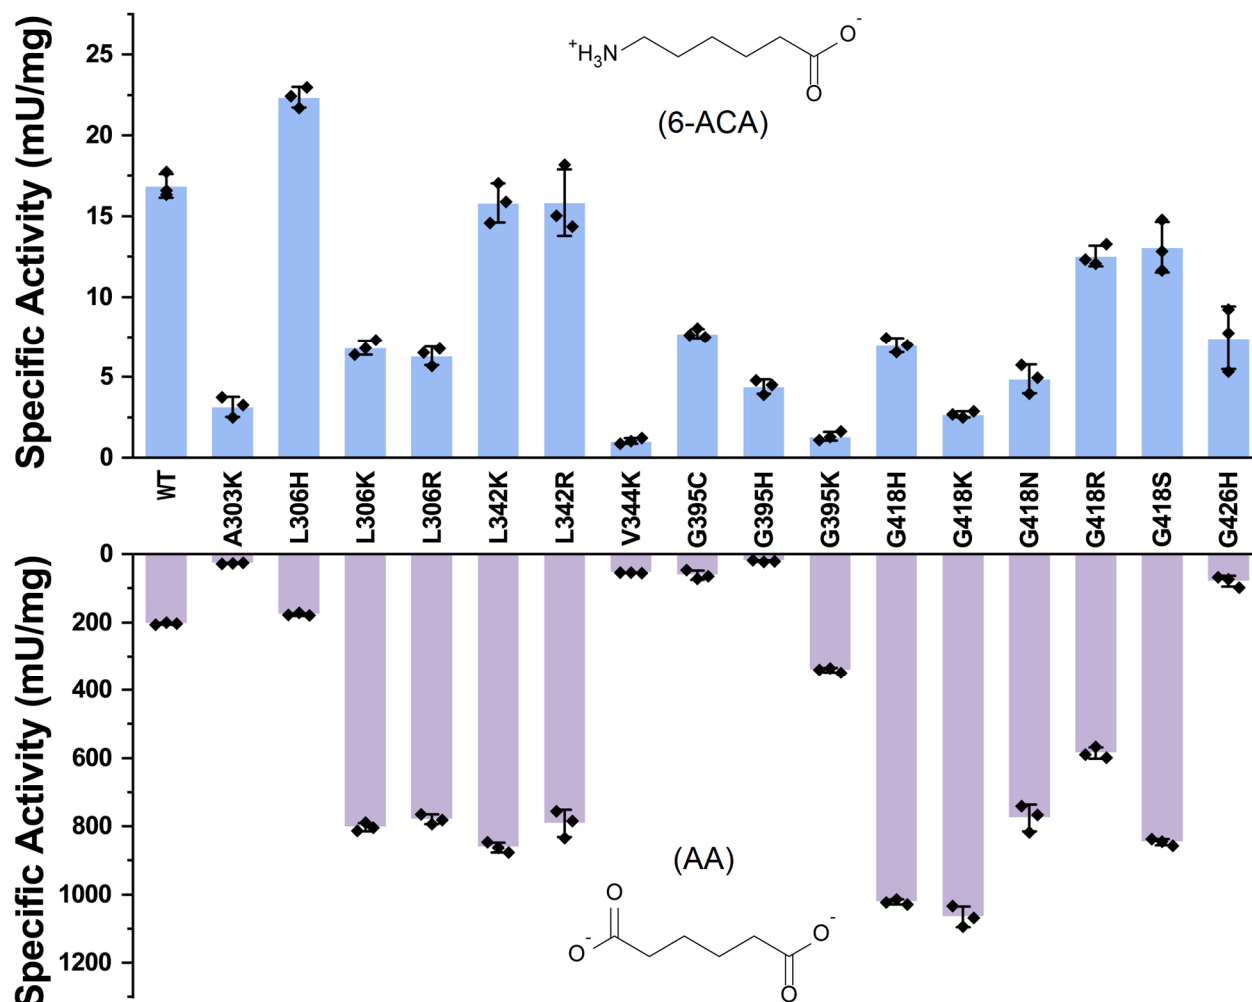

**Fig. S7.** The deamination activity of the 16 designs towards 6-ACA and AA. Data are presented as mean values  $\pm$  SD (n=3 independent experiments). Assays were conducted with 10 mM substrates.



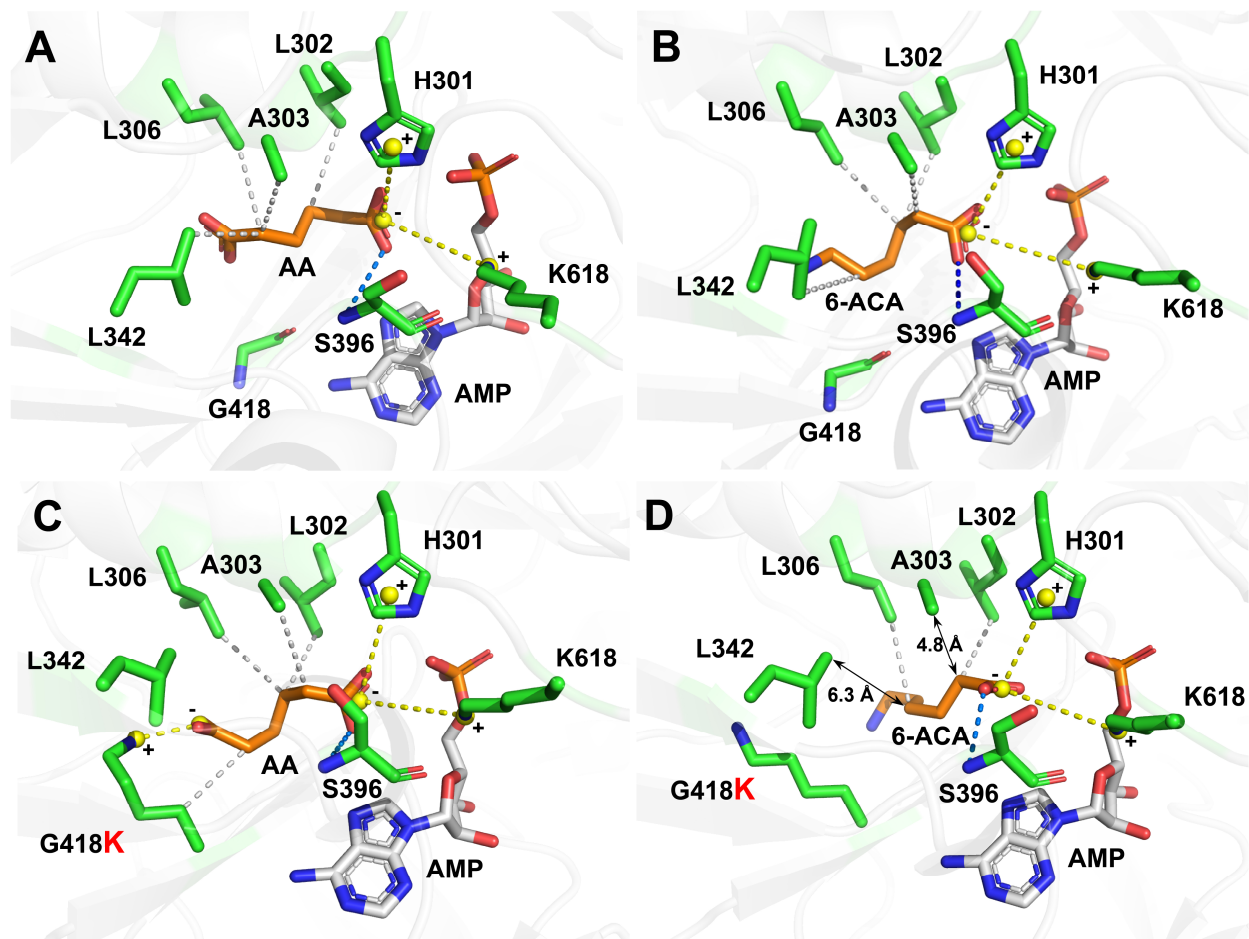

**Fig. S8. Structural comparison of the Rosetta-predicted mode between the *MabCAR3\_WT* and *G418K* with the bound substrate 6-ACA and AA. (A) WT bound AA. (B) WT bound 6-ACA. (C) *G418K* bound AA. (D) *G418K* bound 6-ACA. Grey lines: hydrophobic interaction. Orange lines: salt bridge. Blue lines: hydrogen bond.**

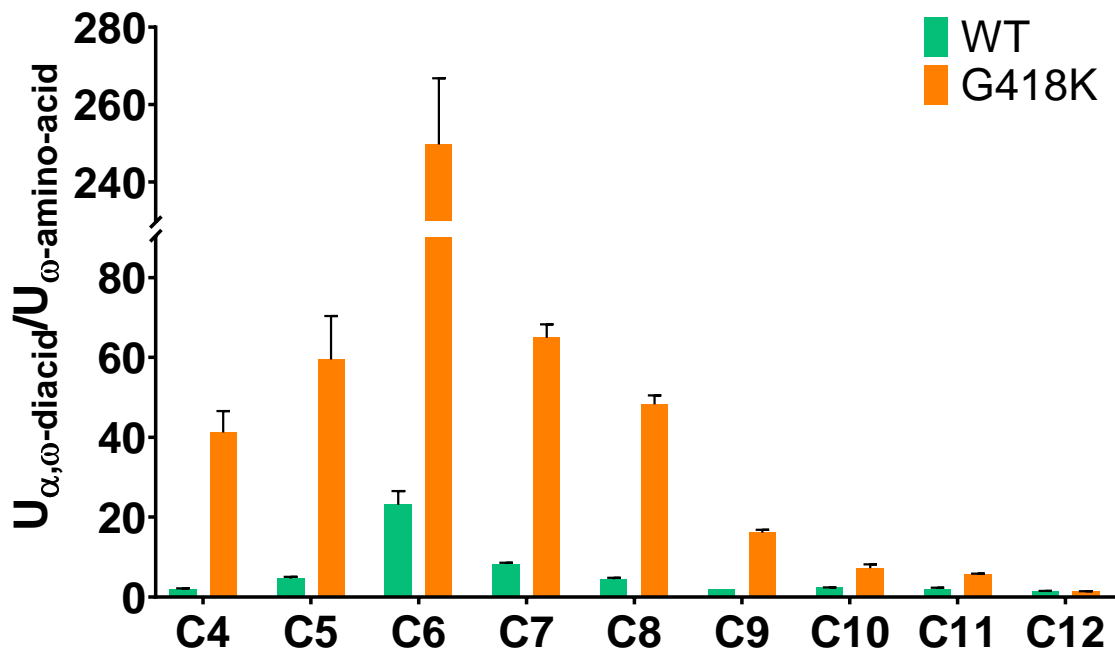

**Fig. S9.**  $U_{\alpha,\omega\text{-diacid}}/U_{\omega\text{-amino-acid}}$  of G418K compared with wildtype (WT). Assays were conducted with 5 mM substrates. Error bars reflect the standard deviations from three replicates.

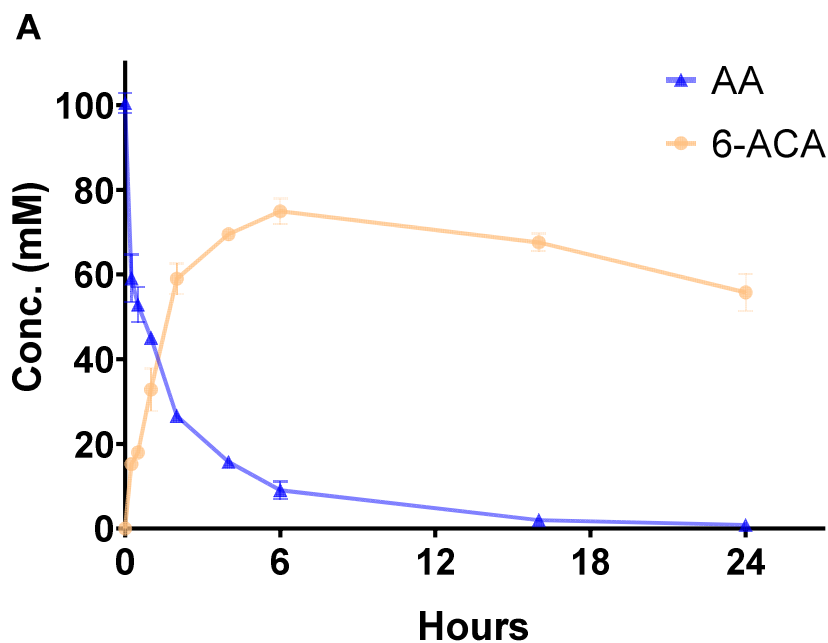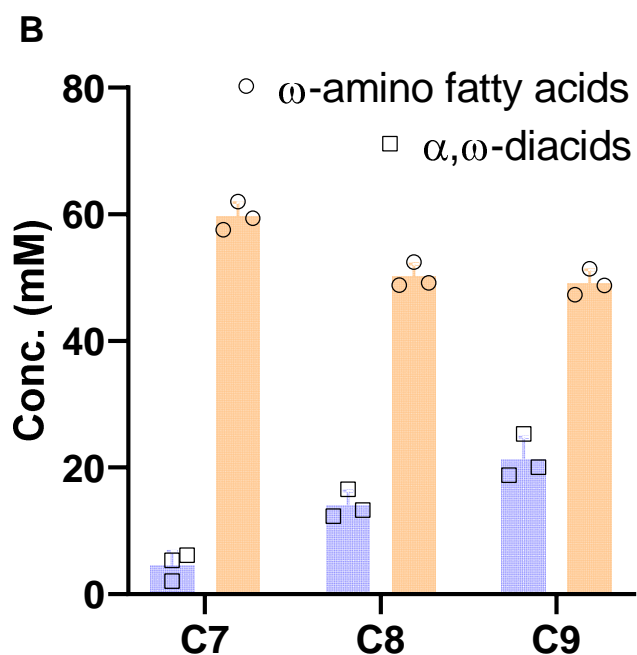

**Fig. S10. Exploring substrate scope of a refined biocatalytic system (10 mL) for synthesizing various  $\omega$ -amino fatty acids (C6-C9). (A) Reaction time-course for 6-ACA biosynthesis with crude enzymes. (B) Conversion of  $\alpha,\omega$ -diacids (C7-C9) to corresponding  $\omega$ -amino fatty acids using crude *MabCAR3\_G418K* and other necessary enzymes (6 h). Data are presented as mean values  $\pm$  SD (n=3 independent experiments).**

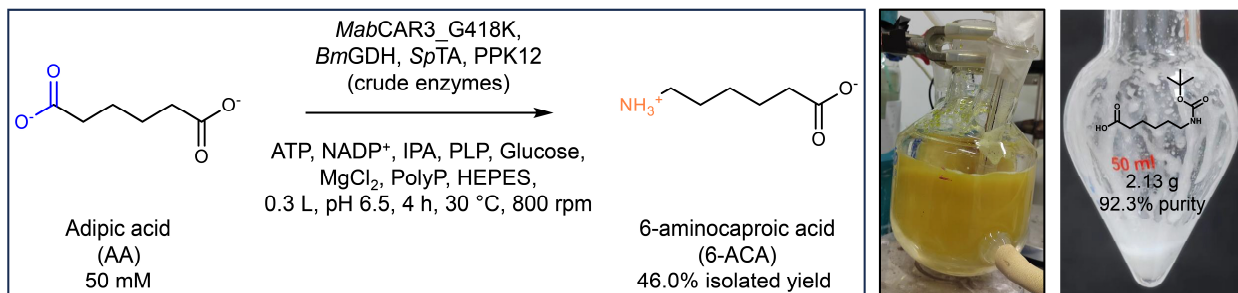

**Fig. S11. Synthesis of 6-ACA derivative at the gram scale.** Data are from one independent experiment.

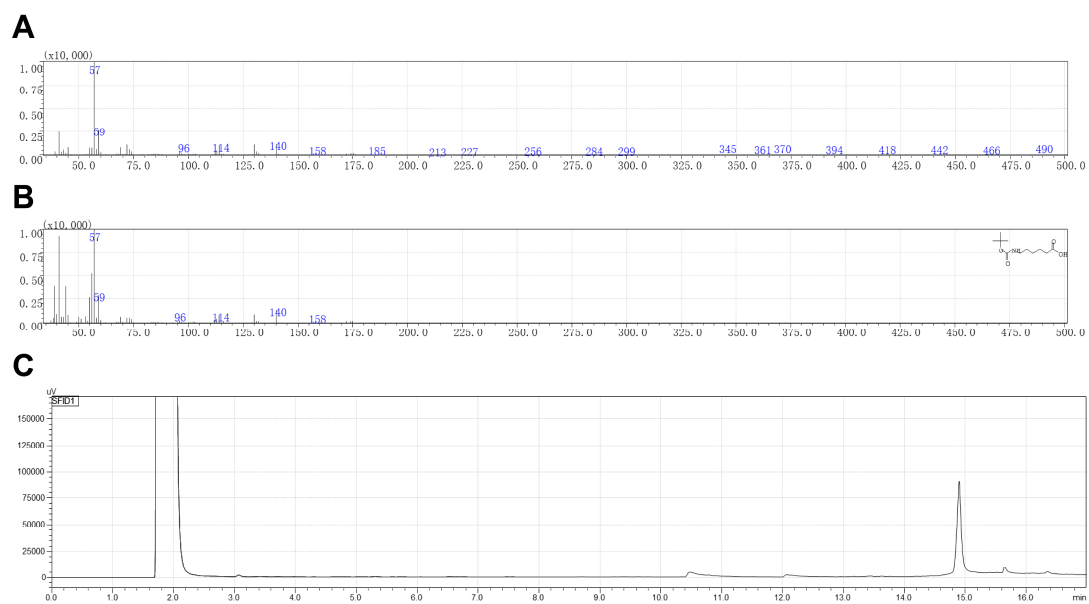

**Fig. S12. The GC-MS/GC analysis of the preparation of Boc- -Ahx-OH. (A) Mass spectrometry analysis of Boc- -Ahx-OH product. (B) Mass spectrometry analysis of Boc- -Ahx-OH standard in NIST database. (C) The GC results for the preparation of Boc- -Ahx-OH (14.9 min).**

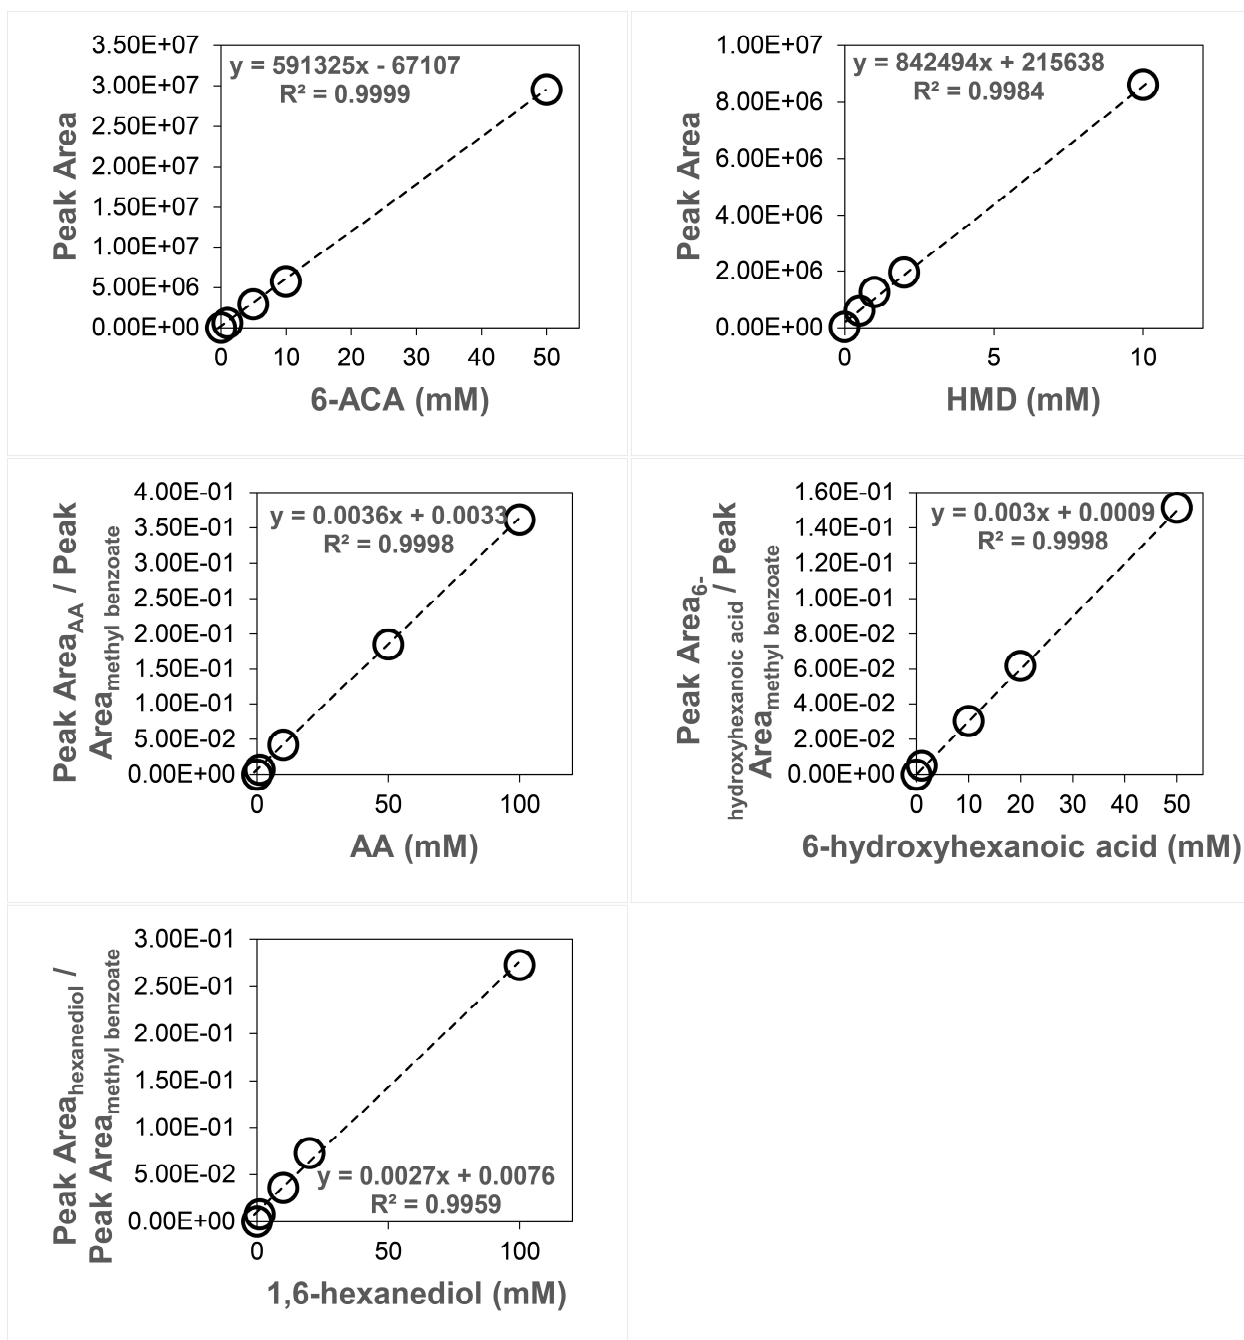

Fig. S13. Calibration curves for product and intermediate.

**Table S1. Rosetta score (interface\_dE) and NAC frequency of selected mutants from Fig. S1A.**

| <b>CARs</b> | <b>interface_dE</b> | <b>NAC frequency</b> |
|-------------|---------------------|----------------------|
| WT          | -6.62               | 16.6%                |
| L284D       | -7.58               | 16.7%                |
| L284E       | -7.41               | 16.9%                |
| L284F       | -7.08               | 17.2%                |
| L284G       | -7.22               | 18.2%                |
| L284I       | -7.06               | 16.9%                |
| L284N       | -7.47               | 16.5%                |
| L284Q       | -7.66               | 16.1%                |
| L284T       | -7.23               | 15.8%                |
| L284V       | -7.14               | 15.3%                |
| L284W       | -7.08               | 17.4%                |
| A303E       | -7.17               | 19.1%                |
| A303I       | -7.04               | 17.3%                |
| A303M       | -7.41               | 16.7%                |
| A303V       | -7.46               | 17.3%                |
| L306I       | -7.20               | 19.7%                |
| L306M       | -6.97               | 16.9%                |
| L306S       | -7.09               | 19.8%                |
| L306V       | -7.22               | 20.5%                |
| L342D       | -7.62               | 15.3%                |
| L342E       | -7.26               | 19.6%                |
| L342F       | -6.99               | 17.0%                |
| L342I       | -7.00               | 19.3%                |
| L342K       | -6.96               | 16.2%                |
| L342M       | -7.03               | 21.4%                |
| L342N       | -7.51               | 17.6%                |
| L342Q       | -7.14               | 19.9%                |
| L342R       | -7.44               | 15.8%                |
| L342V       | -6.90               | 17.6%                |
| L342W       | -6.88               | 17.7%                |
| G393A       | -6.99               | 16.4%                |
| G393D       | -7.04               | 19.8%                |
| G393E       | -7.14               | 19.2%                |
| G393Q       | -7.18               | 19.8%                |
| G395A       | -7.41               | 15.6%                |
| G395E       | -7.17               | 19.4%                |
| G418D       | -6.99               | 15.5%                |
| G418E       | -6.98               | 17.3%                |
| G426S       | -6.94               | 21.3%                |

**Table S2. Candidate residues in the combinatorial mutation library.**

| Position | Residue               | Number of residues |
|----------|-----------------------|--------------------|
| 284      | W V T Q N E D G F I L | 11                 |
| 303      | A V M I               | 4                  |
| 306      | L I M                 | 3                  |
| 342      | E D                   | 2                  |
| 393      | E G D Q A             | 5                  |
| 418      | G E D                 | 3                  |
| 426      | S G                   | 2                  |

\*Total 7920 mutants in the library.



**Table S3. Combinatorial mutations selected for experiment characterization.**

| Name   | Combinatorial mutations  |
|--------|--------------------------|
| ACA-1  | 284D303M306I342E393A     |
| ACA-2  | 284D306M342E             |
| ACA-3  | 284D303I306I342E418D     |
| ACA-4  | 284I306M342E393E         |
| ACA-5  | 284D306M342E393A418E     |
| ACA-6  | 284D306M342E393E         |
| ACA-7  | 284E306M342E393A426S     |
| ACA-8  | 284F306I342D393E         |
| ACA-9  | 284F306M342D393E         |
| ACA-10 | 303M306I342D393E         |
| ACA-11 | 303M306M342D393Q         |
| ACA-12 | 284D306M342D393E         |
| ACA-13 | 306I342D418D             |
| ACA-14 | 284E303I306I342E393E     |
| ACA-15 | 284D303M306I342E393A418D |
| ACA-16 | 284Q306M342E418E426S     |
| ACA-17 | 284D303I306I342D393E418E |
| ACA-18 | 284F306I342E393Q         |

\*WT: 284L/303A/306L/342L/393G/418G

**Table S4. Fold changes in specific activity of the *MabCAR3* mutants compared to the wild type with different substrates.**

| Substrates              | $U_{ACA-1}/U_{WT}$ | $U_{ACA-4}/U_{WT}$ |
|-------------------------|--------------------|--------------------|
| butanedioic acid        | 7.23               | 10.9               |
| 4-aminobutyric acid     | 0.77               | 1.10               |
| glutaric acid           | 6.59               | 1.86               |
| 5-aminovaleric acid     | 4.00               | 4.51               |
| AA                      | 10.3               | 1.76               |
| 6-ACA                   | 28.1               | 37.6               |
| pimelic acid            | 3.55               | 0.92               |
| 7-aminoheptanoic acid   | 10.8               | 32.4               |
| octanedioic acid        | 3.79               | 1.08               |
| 8-aminocaprylic acid    | 6.40               | 12.6               |
| azelaic acid            | 3.02               | 1.36               |
| 9-aminononanoic acid    | 1.83               | 4.16               |
| sebacic acid            | 1.93               | 1.58               |
| 10-aminodecanoic acid   | 1.70               | 3.63               |
| undecandioic acid       | 3.54               | 1.57               |
| 11-aminoundecanoic acid | 0.81               | 1.68               |
| dodecanedioic acid      | 2.01               | 1.55               |
| 12-aminododecanoic acid | 1.22               | 1.98               |

Assays were conducted with 5 mM substrates.

**Table S5. Rosetta score (interface\_dE) and NAC frequency of selected mutants from Fig. 7A.**

| CARs  | AA           |         | 6-ACA        |         |
|-------|--------------|---------|--------------|---------|
|       | interface_dE | NAC (%) | interface_dE | NAC (%) |
| WT    | -11.07       | 15.3    | -6.62        | 16.6    |
| A303K | -13.53       | 16.8    | -6.47        | 10.5    |
| G418S | -13.23       | 15.3    | -6.81        | 14.3    |
| G418K | -12.68       | 16.3    | -6.37        | 14.6    |
| L342R | -13.88       | 15.7    | -7.44        | 15.8    |
| L342K | -14.67       | 16.2    | -6.96        | 16.2    |
| G395H | -13.13       | 16.0    | -6.63        | 11.6    |
| G426H | -13.69       | 16.4    | -5.95        | 21.5    |
| V344K | -14.58       | 17.0    | -6.52        | 13.8    |
| G418R | -12.76       | 14.6    | -6.44        | 17.3    |
| L306H | -12.63       | 18.0    | -6.83        | 11.1    |
| L306K | -12.92       | 15.1    | -6.50        | 15.3    |
| L306R | -12.81       | 16.8    | -6.56        | 13.3    |
| G395C | -12.12       | 16.0    | -6.11        | 18.0    |
| G395K | -15.13       | 13.7    | -6.59        | 11.3    |
| G418N | -12.10       | 16.8    | -6.87        | 13.5    |
| G418H | -11.34       | 17.5    | -6.59        | 11.7    |

**Table S6. The biosynthesis of HMD from 6-ACA using different CARs (WT, ACA-1 and ACA-4) and other necessary enzymes.**

| CARs  | HMD (mM)   |
|-------|------------|
| WT    | 1.4 ± 0.3  |
| ACA-1 | 19.9 ± 0.9 |
| ACA-4 | 22.8 ± 1.1 |

Reaction mixtures (200  $\mu$ L) contained 100 mM HEPES-Na buffer (pH 7.5), 50 mM substrate 6-ACA, 1 mM NAD(P)H, 10 mM ATP, 60 mM MgCl<sub>2</sub>, 60 mM Glucose, 0.5 mM PLP, 100 mM IPA, 50 mM PolyP, 20  $\mu$ g of *BmGDH*, 80  $\mu$ g of PPK12, 146  $\mu$ g of CARs, 180  $\mu$ g of *SpTA*, 30 °C, 1000 rpm, 18 h. Data are presented as mean values +/- SD (n=3 independent experiments).

**Table S7. Enzymes (wild-type) used in this work.**

| Enzyme         | Organism                             | Uniprot ID | Plasmid    | Cloning site   | Mass    |
|----------------|--------------------------------------|------------|------------|----------------|---------|
| <i>MabCAR3</i> | <i>Mycobacterium abscessus</i>       | A0A1M9KYS5 | pET-30b    | NdeI/XhoI      | 129 kDa |
| <i>SpTA</i>    | <i>Silicibacter pomeroyi</i>         | Q5LMU1     | pETDuet-1  | NdeI/XhoI      | 51 kDa  |
| PPK12          | <i>Erysipelotrichaceae bacterium</i> | A0A3D5XRJ5 | pET-28a    | NdeI/XhoI      | 36 kDa  |
| <i>BsSfp</i>   | <i>Bacillus subtilis</i>             | P39135     | pCDFDuet-1 | BamHI/NotI     | 26 kDa  |
| <i>BmGDH</i>   | <i>Bacillus megaterium</i>           | P40288     | pET-28a    | BamHI/Hin dIII | 28 kDa  |
